# Supplementary material
Source: Springer Nature journal article supplement (https://www.springermedizin.de/resource/supplementary/13256_2012_2294_MOESM1_ESM.pdf/9649324)

CSF I x 500

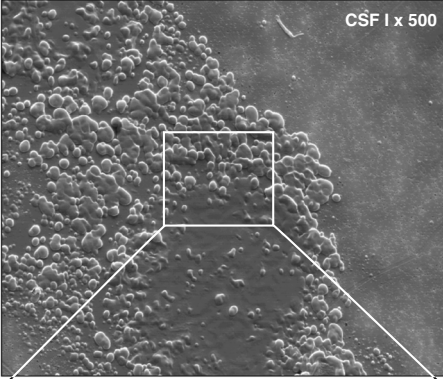

CSF II x 500

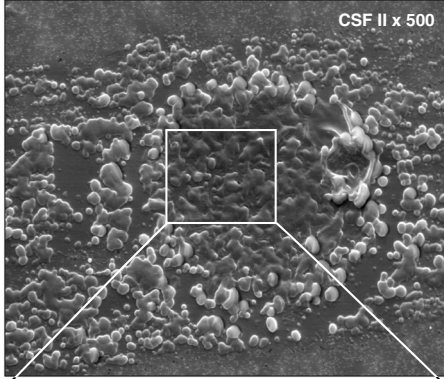

CSF I x 2 000

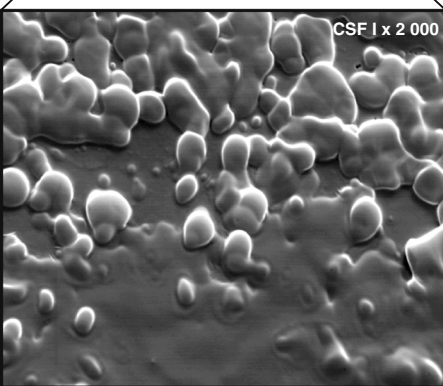

CSF II x 2 000

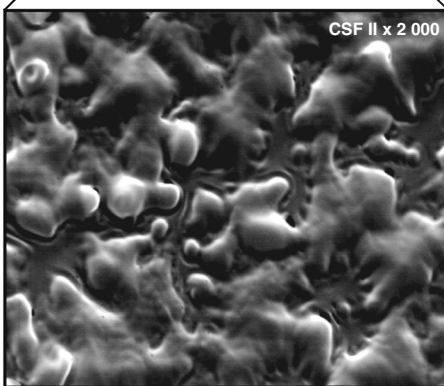

CSF I x 2 000

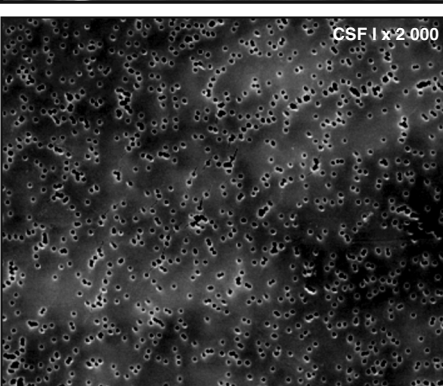

CSF II x 2 000

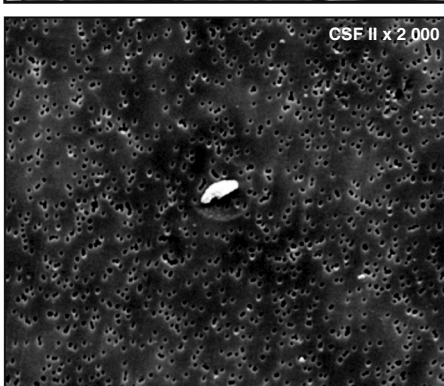

Supplement: MOESM1 [file 9649324]
